# Supplementary material for: On the computation of planetary boundary-layer height using the bulk Richardson number method
Source: Copernicus journal article supplement (doi:10.5194/gmd-7-2599-2014), 2014-11-10
Supplement: Supplementary file 1 [file gmd-7-2599-2014-supplement.pdf]

Supplement of Geosci. Model Dev., 7, 2599–2611, 2014  
<http://www.geosci-model-dev.net/7/2599/2014/>  
doi:10.5194/gmd-7-2599-2014-supplement  
© Author(s) 2014. CC Attribution 3.0 License.

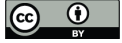

*Supplement of*

## **On the computation of planetary boundary-layer height using the bulk Richardson number method**

**Y. Zhang et al.**

*Correspondence to:* Z. Gao (zgao@mail.iap.ac.cn)

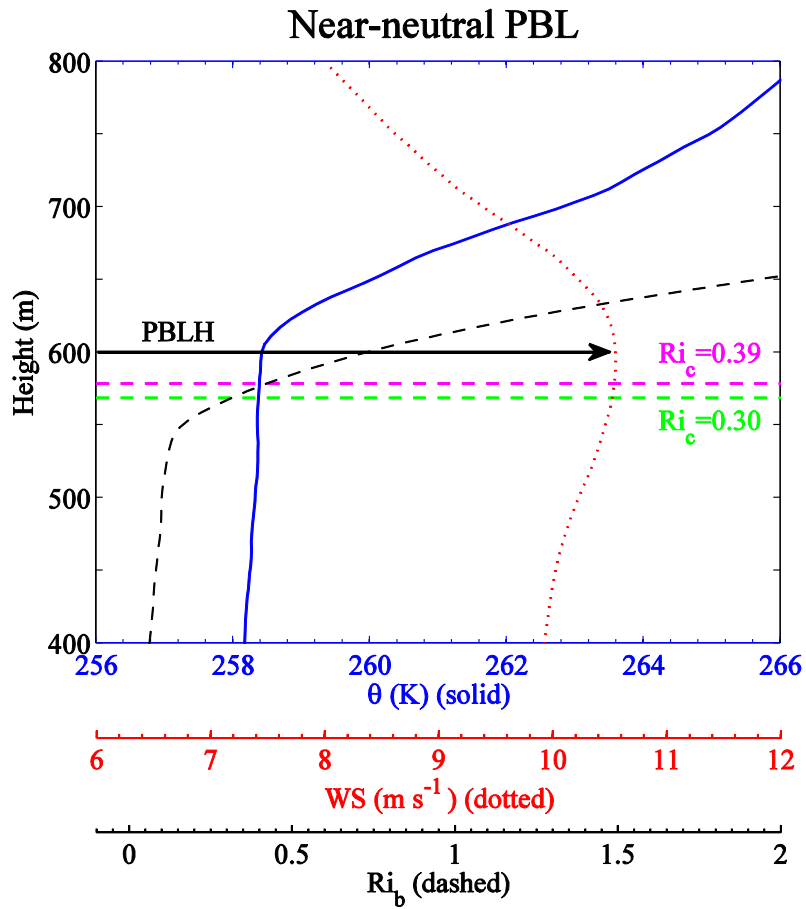

Figure S1: Typical profiles of potential temperature (blue), wind speed (red), and  $Ri_b$  (black) for a near-neutral PBL (from SHEBA on 19 October, 1997 0515 LST). The PBLH indicated by the black arrow is calculated by the LLJ methods and the PBLH indicated by the green and purple arrows are calculated by the bulk Richardson number method with  $Ri_{bc} = 0.30$  and 0.39, respectively.
